# Supplementary material for: Designing N, P-doped graphene surface-supported Mo single-atom catalysts for efficient conversion of nitrogen into ammonia: a computational guideline
Source: Royal Society of Chemistry journal article supplement (doi:10.1039/d4na00298a), 2024-01-01
Supplement: d4na00298a1.pdf [file d4na00298a1.pdf]

## Supporting Information

### Designing N, P-doped graphene surface-supported Mo single atom catalysts for efficient conversion of nitrogen into ammonia: A computational guideline

Ghada E. Khedr <sup>a†</sup>, Samar M. Fawzy <sup>b†</sup>, Icell M. Sharafeldin <sup>b</sup> and Nageh K. Allam <sup>b\*</sup>

<sup>a</sup> Department of Analysis & Evaluation, Egyptian Petroleum Research Institute (EPRI), Cairo 11727, Egypt.

<sup>b</sup> Energy Materials Laboratory, Physics Department, School of Sciences & Engineering, The American University in Cairo, New Cairo 11835, Egypt.

\*Corresponding Author's email: [nageh.allam@aucegypt.edu](mailto:nageh.allam@aucegypt.edu)

† Equal Contribution.

**Table S1.** The dissolution potential ( $U_{\text{diss}}$ ) of metal for the four catalysts

| Structures                                 | $E_f$ (eV) | $U_{\text{diss}}$ (eV) |
|--------------------------------------------|------------|------------------------|
| MoP <sub>4</sub> G                         | -2.76      | 0.57                   |
| MoN <sub>1</sub> P <sub>3</sub> G          | -2.88      | 0.59                   |
| MoN <sub>2</sub> P <sub>2</sub> G $\alpha$ | -0.9       | 0.26                   |
| MoN <sub>2</sub> P <sub>2</sub> G $\beta$  | -3.78      | 0.74                   |
| MoN <sub>2</sub> P <sub>2</sub> G $\gamma$ | -0.18      | 0.14                   |
| MoN <sub>3</sub> P <sub>1</sub> G          | -4.8       | 0.91                   |
| MoN <sub>4</sub> G                         | -4.32      | 0.83                   |
| MoG                                        | -3.24      | 0.65                   |

$U_{\text{diss}}$  is calculated as  $U_{\text{diss}} = U_{\text{diss}}^0 - E_f/ne$ , where  $U_{\text{diss}}^0$  and  $n$  represent the standard dissolution potential of bulk metal and the number of electrons included in the dissolution, respectively.  $E_f$  is calculated by  $E_f = E_{\text{Mo-P}_n\text{N}_m\text{G}} - E_{\text{P}_n\text{N}_m\text{G}} - E_{\text{Mo}}$ , where  $E_{\text{Mo-P}_n\text{N}_m\text{G}}$ ,  $E_{\text{P}_n\text{N}_m\text{G}}$ , and  $E_{\text{Mo}}$  are the total energy of the catalyst, substrate, and molybdenum atom in its bulk structure, respectively.

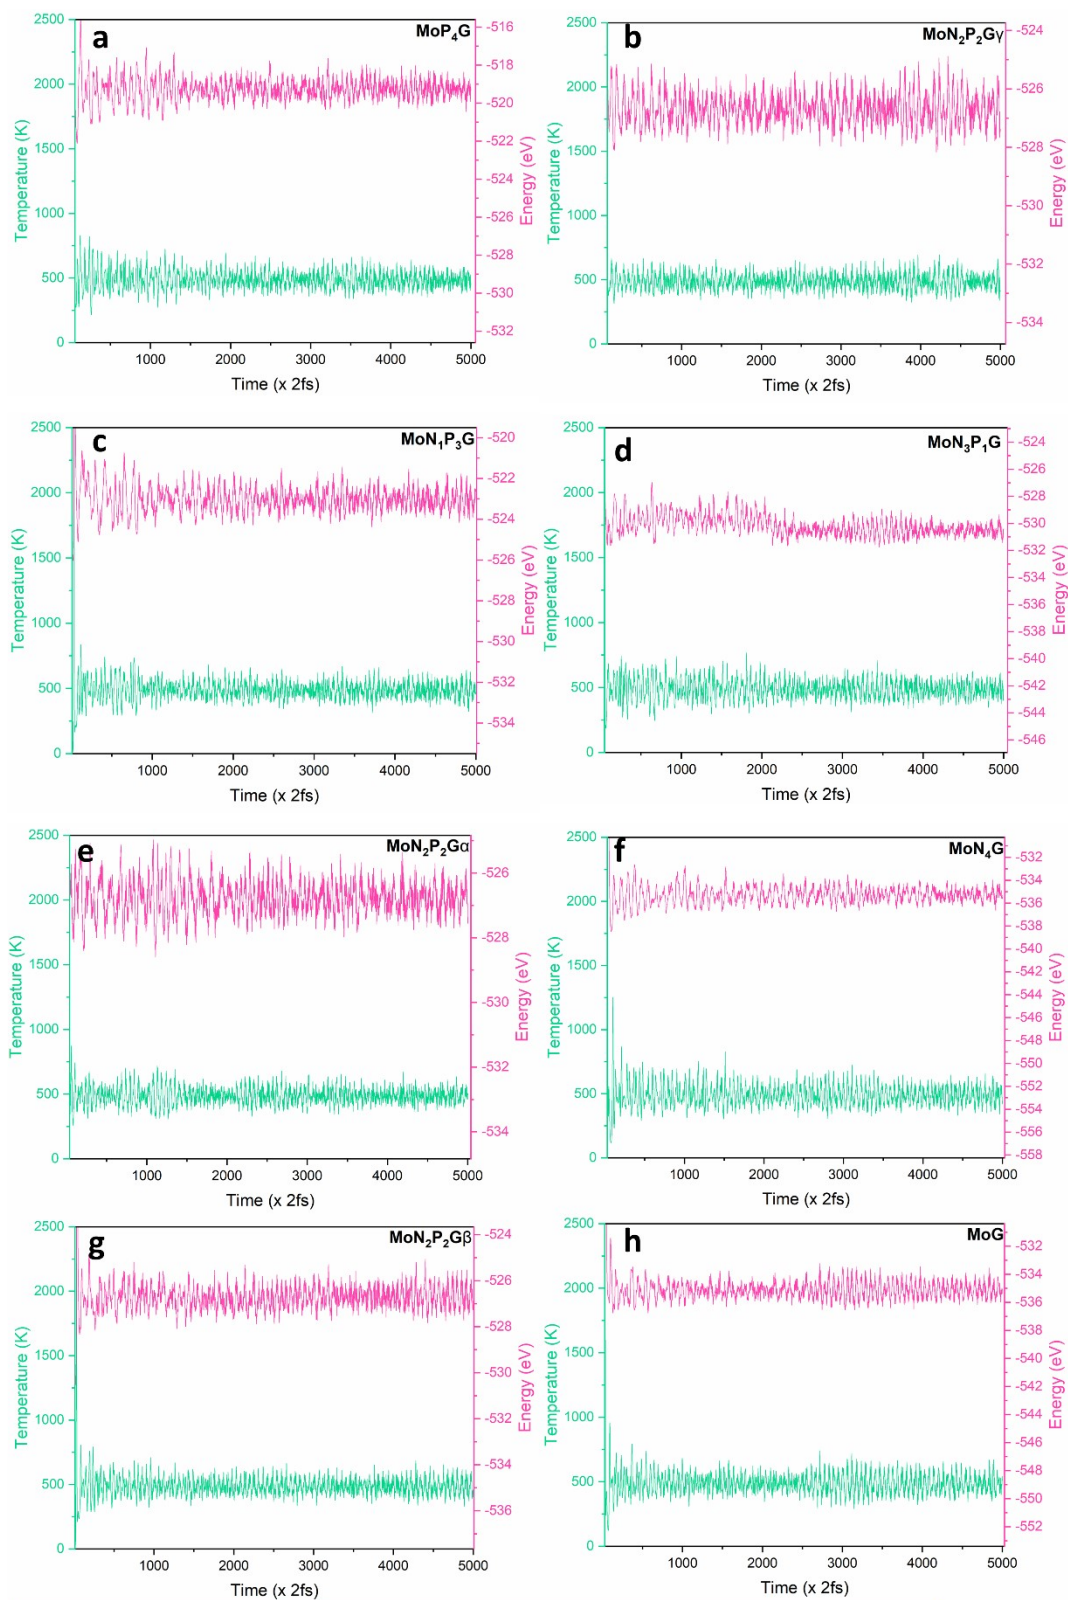

**Figure S1.** Total Energy and temperature variation with simulation time for the eight studied catalysts.
